# Supplementary material
Source: PubMed Central journal article supplement (PMC4031501)
Supplement: supp_M113.515023_jbc.M113.515023-1.pdf [file supp_M113.515023_jbc.M113.515023-1.pdf]

**Supplemental data for**

**Cell Penetrating Peptides and Cationic Antibacterial Peptides: two sides of the same coin.**

**This material includes:**

1 Supplemental table

## SUPPLEMENTAL TABLE

**Table S1. Endocytosis-related genes**

| <b>Index</b> | <b>ORF</b> | <b>Phenotype</b>       | <b>Relative AUC</b> |
|--------------|------------|------------------------|---------------------|
| 1            | YAL010C    | endocytosis: decreased | 0.20                |
| 2            | YAL013W    | endocytosis: decreased | 0.35                |
| 3            | YAL047C    | endocytosis: decreased | 0.12                |
| 4            | YAL053W    | endocytosis: decreased | 0.35                |
| 5            | YAL055W    | endocytosis: decreased | 0.28                |
| 6            | YAL068C    | endocytosis: decreased | (0.60)              |
| 7            | YBL006C    | endocytosis: decreased | 0.20                |
| 8            | YBL007C    | endocytosis: decreased | (0.30)              |
| 9            | YBL016W    | endocytosis: decreased | 0.11                |
| 10           | YBL027W    | endocytosis: decreased | 0.21                |
| 11           | YBL047C    | endocytosis: decreased | 0.21                |
| 12           | YBL058W    | endocytosis: decreased | 0.14                |
| 13           | YBL082C    | endocytosis: decreased | 0.16                |
| 14           | YBL083C    | endocytosis: decreased | 0.16                |
| 15           | YBL101C    | endocytosis: decreased | (0.39)              |
| 16           | YBR019C    | endocytosis: decreased | 0.66                |
| 17           | YBR059C    | endocytosis: decreased | (0.29)              |
| 18           | YBR150C    | endocytosis: decreased | 0.27                |
| 19           | YBR229C    | endocytosis: decreased | 0.22                |
| 20           | YBR248C    | endocytosis: decreased | 0.22                |
| 21           | YBR255W    | endocytosis: decreased | 0.37                |
| 22           | YBR266C    | endocytosis: decreased | 0.42                |

|    |         |                        |        |
|----|---------|------------------------|--------|
| 23 | YBR289W | endocytosis: decreased | (0.52) |
| 24 | YCL005W | endocytosis: decreased | 0.23   |
| 25 | YCL008C | endocytosis: decreased | 0.37   |
| 26 | YCL046W | endocytosis: decreased | 0.20   |
| 27 | YCR002C | endocytosis: decreased | 0.17   |
| 28 | YCR009C | endocytosis: decreased | (0.30) |
| 29 | YCR017C | endocytosis: decreased | 0.37   |
| 30 | YCR028C | endocytosis: decreased | (0.31) |
| 31 | YDL096C | endocytosis: decreased | (0.68) |
| 32 | YDL146W | endocytosis: decreased | (0.31) |
| 33 | YDL161W | endocytosis: decreased | (0.37) |
| 34 | YDL176W | endocytosis: decreased | 0.21   |
| 35 | YDL194W | endocytosis: decreased | 0.11   |
| 36 | YDL231C | endocytosis: decreased | (0.37) |
| 37 | YDR006C | endocytosis: decreased | 0.41   |
| 38 | YDR017C | endocytosis: abnormal  | 0.33   |
| 39 | YDR050C | endocytosis: decreased | 0.17   |
| 40 | YDR072C | endocytosis: decreased | (0.72) |
| 41 | YDR129C | endocytosis: decreased | (0.29) |
| 42 | YDR173C | endocytosis: abnormal  | 0.19   |
| 43 | YDR207C | endocytosis: decreased | 0.11   |
| 44 | YDR221W | endocytosis: decreased | 0.15   |
| 45 | YDR225W | endocytosis: decreased | 0.22   |
| 46 | YDR226W | endocytosis: decreased | (0.36) |
| 47 | YDR233C | endocytosis: decreased | 0.29   |
| 48 | YDR234W | endocytosis: decreased | 0.22   |
| 49 | YDR276C | endocytosis: decreased | 0.69,  |
| 50 | YDR335W | endocytosis: decreased | 0.13   |

|    |           |                        |        |
|----|-----------|------------------------|--------|
| 51 | YDR346C   | endocytosis: decreased | 0.18   |
| 52 | YDR364C   | endocytosis: decreased | 0.20   |
| 53 | YDR368W   | endocytosis: decreased | 0.19   |
| 54 | YDR388W   | endocytosis: decreased | (0.44) |
| 55 | YDR414C   | endocytosis: decreased | 0.23   |
| 56 | YEL013W   | endocytosis: decreased | (0.38) |
| 57 | YEL031W   | endocytosis: decreased | 0.22   |
| 58 | YEL045C   | endocytosis: decreased | (0.38) |
| 59 | YEL060C   | endocytosis: decreased | 0.19   |
| 60 | YEL063C   | endocytosis: decreased | 0.41   |
| 61 | YEL067C   | endocytosis: decreased | (0.50) |
| 62 | YER056C-A | endocytosis: decreased | 0.27   |
| 63 | YER069W   | endocytosis: decreased | 0.33   |
| 64 | YER074W   | endocytosis: decreased | (0.47) |
| 65 | YFL025C   | endocytosis: decreased | 0.12   |
| 66 | YFL031W   | endocytosis: decreased | (0.51) |
| 67 | YFL034W   | endocytosis: decreased | 0.45   |
| 68 | YFR001W   | endocytosis: decreased | 0.11   |
| 69 | YFR024C-A | endocytosis: decreased | 0.19   |
| 70 | YFR031C-A | endocytosis: decreased | (0.65) |
| 71 | YGL012W   | endocytosis: decreased | 0.20   |
| 72 | YGL014W   | endocytosis: decreased | 0.14   |
| 73 | YGL016W   | endocytosis: decreased | 0.22   |
| 74 | YGL027C   | endocytosis: decreased | (0.72) |
| 75 | YGL045W   | endocytosis: decreased | (0.29) |
| 76 | YGL058W   | endocytosis: decreased | (0.52) |
| 77 | YGL066W   | endocytosis: decreased | 0.15   |
| 78 | YGL072C   | endocytosis: decreased | 0.12   |

|     |         |                             |        |
|-----|---------|-----------------------------|--------|
| 79  | YGL076C | endocytosis: decreased      | 0.18   |
| 80  | YGL084C | endocytosis: decreased      | 0.30   |
| 81  | YGL198W | endocytosis: decreased      | 0.31   |
| 82  | YGL200C | endocytosis: decreased      | 0.21   |
| 83  | YGL219C | endocytosis: decreased      | (0.42) |
| 84  | YGL256W | endocytosis: decreased      | 0.23   |
| 85  | YGR036C | endocytosis: decreased      | 0.16   |
| 86  | YGR056W | endocytosis: decreased      | 0.47   |
| 87  | YGR058W | endocytosis: decreased      | (0.58) |
| 88  | YGR061C | endocytosis: decreased      | (0.50) |
| 89  | YGR078C | endocytosis: decreased      | 0.59   |
| 90  | YGR080W | endocytosis: decreased      | (0.57) |
| 91  | YGR086C | endocytosis: decreased rate | (0.25) |
| 92  | YGR100W | endocytosis: decreased      | (0.75) |
| 93  | YGR122W | endocytosis: decreased      | (0.72) |
| 94  | YGR126W | endocytosis: decreased      | 0.17   |
| 95  | YGR138C | endocytosis: decreased      | 0.19   |
| 96  | YGR143W | endocytosis: decreased      | (0.54) |
| 97  | YGR157W | endocytosis: decreased      | (0.63) |
| 98  | YGR160W | endocytosis: decreased      | 0.37   |
| 99  | YGR206W | endocytosis: decreased      | 0.22   |
| 100 | YGR240C | endocytosis: decreased      | 0.32   |
| 101 | YGR241C | endocytosis: decreased      | (0.34) |
| 102 | YGR242W | endocytosis: decreased      | 0.22   |
| 103 | YGR256W | endocytosis: decreased      | 0.13   |
| 104 | YGR259C | endocytosis: decreased      | 0.24   |
| 105 | YHL019C | endocytosis: decreased      | 0.40   |
| 106 | YHL027W | endocytosis: decreased      | 0.27   |

|     |         |                        |         |
|-----|---------|------------------------|---------|
| 107 | YHR030C | endocytosis: decreased | 0.44    |
| 108 | YHR079C | endocytosis: decreased | 0.20    |
| 109 | YHR081W | endocytosis: decreased | 0.33    |
| 110 | YHR082C | endocytosis: decreased | (0.75)  |
| 111 | YHR092C | endocytosis: decreased | 0.23    |
| 112 | YHR114W | endocytosis: decreased | (0.40)  |
| 113 | YHR161C | endocytosis: decreased | (1.14)* |
| 114 | YIL020C | endocytosis: decreased | 0.50    |
| 115 | YIL027C | endocytosis: decreased | 0.15    |
| 116 | YIL034C | endocytosis: decreased | 0.13    |
| 117 | YIL041W | endocytosis: decreased | (0.53)  |
| 118 | YIL049W | endocytosis: decreased | 0.24    |
| 119 | YIL064W | endocytosis: decreased | 0.16    |
| 120 | YIL076W | endocytosis: decreased | 0.21    |
| 121 | YIL084C | endocytosis: decreased | 0.30    |
| 122 | YIL090W | endocytosis: decreased | (0.69)  |
| 123 | YIL093C | endocytosis: decreased | 0.23    |
| 124 | YIL116W | endocytosis: decreased | 0.33    |
| 125 | YIL128W | endocytosis: decreased | 0.12    |
| 126 | YIL130W | endocytosis: decreased | 0.17    |
| 127 | YIL154C | endocytosis: decreased | 0.10    |
| 128 | YIL163C | endocytosis: decreased | 0.19    |
| 129 | YIR003W | endocytosis: decreased | (0.49)  |
| 130 | YIR005W | endocytosis: decreased | 0.24    |
| 131 | YIR009W | endocytosis: decreased | 0.36    |
| 132 | YIR021W | endocytosis: decreased | (0.56)  |
| 133 | YIR026C | endocytosis: decreased | 0.29    |
| 134 | YIR034C | endocytosis: decreased | (0.71)  |

|     |           |                        |        |
|-----|-----------|------------------------|--------|
| 135 | YJL020C   | endocytosis: decreased | 0.14   |
| 136 | YJL153C   | endocytosis: decreased | 0.16   |
| 137 | YJL175W   | endocytosis: decreased | 0.18   |
| 138 | YJL176C   | endocytosis: decreased | 0.13   |
| 139 | YJL183W   | endocytosis: decreased | 0.17   |
| 140 | YJL204C   | endocytosis: abnormal  | (0.29) |
| 141 | YJL215C   | endocytosis: decreased | 0.20   |
| 142 | YJR010C-A | endocytosis: decreased | 0.19   |
| 143 | YJR033C   | endocytosis: decreased | 0.42   |
| 144 | YJR055W   | endocytosis: decreased | 0.28   |
| 145 | YJR106W   | endocytosis: decreased | 0.38   |
| 146 | YJR116W   | endocytosis: decreased | (0.71) |
| 147 | YJR118C   | endocytosis: decreased | 0.44   |
| 148 | YJR121W   | endocytosis: decreased | 0.18   |
| 149 | YKL001C   | endocytosis: decreased | 0.28   |
| 150 | YKL002W   | endocytosis: decreased | (0.56) |
| 151 | YKL007W   | endocytosis: decreased | 0.11   |
| 152 | YKL032C   | endocytosis: decreased | 0.17   |
| 153 | YKL041W   | endocytosis: decreased | 0.39   |
| 154 | YKL063C   | endocytosis: decreased | 0.39   |
| 155 | YKL065C   | endocytosis: decreased | (0.54) |
| 156 | YKL071W   | endocytosis: decreased | 0.42   |
| 157 | YKL072W   | endocytosis: decreased | 0.27   |
| 158 | YKL073W   | endocytosis: decreased | 0.38   |
| 159 | YKL074C   | endocytosis: decreased | (0.51) |
| 160 | YKL081W   | endocytosis: decreased | 1.1*   |
| 161 | YKL119C   | endocytosis: decreased | 2.3*   |
| 162 | YKL126W   | endocytosis: absent    | (0.56) |

|     |           |                        |        |
|-----|-----------|------------------------|--------|
| 163 | YKL136W   | endocytosis: decreased | (0.51) |
| 164 | YKL139W   | endocytosis: decreased | (0.43) |
| 165 | YKL160W   | endocytosis: decreased | (0.3)  |
| 166 | YKL204W   | endocytosis: decreased | (0.25) |
| 167 | YKL212W   | endocytosis: delayed   | (0.23) |
| 168 | YKR001C   | endocytosis: decreased | (0.27) |
| 169 | YKR035C   | endocytosis: decreased | (0.31) |
| 170 | YKR035W-A | endocytosis: decreased | (0.51) |
| 171 | YLL014W   | endocytosis: decreased | (0.37) |
| 172 | YLL033W   | endocytosis: decreased | 0.64   |
| 173 | YLL038C   | endocytosis: decreased | (0.38) |
| 174 | YLL039C   | endocytosis: decreased | (0.59) |
| 175 | YLR025W   | endocytosis: decreased | (0.55) |
| 176 | YLR056W   | endocytosis: decreased | (0.31) |
| 177 | YLR069C   | endocytosis: decreased | 0.18   |
| 178 | YLR087C   | endocytosis: decreased | (0.31) |
| 179 | YLR113W   | endocytosis: decreased | (0.40) |
| 180 | YLR120C   | endocytosis: decreased | 0.43   |
| 181 | YLR136C   | endocytosis: decreased | 0.71   |
| 182 | YLR139C   | endocytosis: decreased | 0.34   |
| 183 | YLR149C   | endocytosis: decreased | (0.52) |
| 184 | YLR150W   | endocytosis: decreased | 0.29   |
| 185 | YLR169W   | endocytosis: decreased | 0.67   |
| 186 | YLR170C   | endocytosis: decreased | 0.19   |
| 187 | YLR171W   | endocytosis: decreased | (0.34) |
| 188 | YLR200W   | endocytosis: decreased | 0.17   |
| 189 | YLR262C-A | endocytosis: decreased | 0.14   |
| 190 | YLR320W   | endocytosis: decreased | 0.18   |



|     |           |                        |        |
|-----|-----------|------------------------|--------|
| 191 | YLR342W   | endocytosis: decreased | (0.32) |
| 192 | YLR422W   | endocytosis: decreased | 0.18   |
| 193 | YLR425W   | endocytosis: decreased | 0.14   |
| 194 | YLR428C   | endocytosis: decreased | 0.24   |
| 195 | YLR429W   | endocytosis: decreased | 0.26   |
| 196 | YML008C   | endocytosis: decreased | 0.78   |
| 197 | YML012W   | endocytosis: decreased | 0.25   |
| 198 | YML014W   | endocytosis: decreased | 0.17   |
| 199 | YML017W   | endocytosis: decreased | 0.18   |
| 200 | YML019W   | endocytosis: decreased | 0.19   |
| 201 | YML048W   | endocytosis: decreased | 0.25   |
| 202 | YMR023C   | endocytosis: decreased | 0.17   |
| 203 | YMR024W   | endocytosis: decreased | (0.35) |
| 204 | YMR031W-A | endocytosis: decreased | 0.23   |
| 205 | YMR032W   | endocytosis: decreased | 0.64   |
| 206 | YMR063W   | endocytosis: decreased | (0.50) |
| 207 | YMR074C   | endocytosis: decreased | (0.61) |
| 208 | YMR091C   | endocytosis: decreased | 0.78   |
| 209 | YMR092C   | endocytosis: decreased | (0.56) |
| 210 | YMR198W   | endocytosis: decreased | 0.17   |
| 211 | YMR272C   | endocytosis: decreased | (0.67) |
| 212 | YMR289W   | endocytosis: decreased | (0.58) |
| 213 | YMR307W   | endocytosis: decreased | 0.18   |
| 214 | YNL004W   | endocytosis: decreased | 0.55   |
| 215 | YNL016W   | endocytosis: decreased | (0.29) |
| 216 | YNL032W   | endocytosis: decreased | (0.29) |
| 217 | YNL050C   | endocytosis: decreased | 0.10   |
| 218 | YNL069C   | endocytosis: decreased | 0.15   |

|     |         |                        |        |
|-----|---------|------------------------|--------|
| 219 | YNL079C | endocytosis: decreased | 0.23   |
| 220 | YNL097C | endocytosis: decreased | 0.15   |
| 221 | YNL105W | endocytosis: decreased | (0.62) |
| 222 | YNL106C | endocytosis: decreased | (0.56) |
| 223 | YNL123W | endocytosis: decreased | 0.16   |
| 224 | YNL196C | endocytosis: decreased | (0.37) |
| 225 | YNL197C | endocytosis: decreased | 0.12   |
| 226 | YNL198C | endocytosis: decreased | 0.54   |
| 227 | YNL199C | endocytosis: decreased | 0.14   |
| 228 | YNL215W | endocytosis: decreased | (0.43) |
| 229 | YNL219C | endocytosis: decreased | 0.10   |
| 230 | YNL238W | endocytosis: decreased | 0.18   |
| 231 | YNL248C | endocytosis: decreased | (0.60) |
| 232 | YNL264C | endocytosis: decreased | 0.13   |
| 233 | YNL266W | endocytosis: decreased | (0.53) |
| 234 | YNL269W | endocytosis: decreased | 0.12   |
| 235 | YNL280C | endocytosis: decreased | 0.32   |
| 236 | YNL294C | endocytosis: decreased | 0.16   |
| 237 | YNL330C | endocytosis: premature | 0.21   |
| 238 | YNR005C | endocytosis: decreased | 0.20   |
| 239 | YNR006W | endocytosis: decreased | 0.19   |
| 240 | YNR010W | endocytosis: decreased | 0.21   |
| 241 | YNR021W | endocytosis: decreased | 0.20   |
| 242 | YNR030W | endocytosis: decreased | 0.11   |
| 243 | YNR031C | endocytosis: decreased | 0.24   |
| 244 | YNR050C | endocytosis: decreased | 0.08   |
| 245 | YOL004W | endocytosis: decreased | 0.19   |
| 246 | YOL006C | endocytosis: decreased | (0.28) |

|     |         |                        |        |
|-----|---------|------------------------|--------|
| 247 | YOL007C | endocytosis: decreased | 0.21   |
| 248 | YOL009C | endocytosis: decreased | 0.34   |
| 249 | YOL018C | endocytosis: decreased | (0.30) |
| 250 | YOL036W | endocytosis: decreased | 0.12   |
| 251 | YOL065C | endocytosis: increased | 0.13   |
| 252 | YOL072W | endocytosis: decreased | 0.11   |
| 253 | YOR008C | endocytosis: decreased | (0.71) |
| 254 | YOR016C | endocytosis: decreased | 0.76   |
| 255 | YOR026W | endocytosis: decreased | 0.32   |
| 256 | YOR030W | endocytosis: decreased | 0.20   |
| 257 | YOR035C | endocytosis: decreased | (0.45) |
| 258 | YOR036W | endocytosis: decreased | (0.46) |
| 259 | YOR043W | endocytosis: decreased | (0.62) |
| 260 | YOR067C | endocytosis: decreased | (0.75) |
| 261 | YOR089C | endocytosis: abnormal  | (0.26) |
| 262 | YOR126C | endocytosis: decreased | (0.78) |
| 263 | YOR127W | endocytosis: decreased | (0.59) |
| 264 | YOR141C | endocytosis: decreased | (1.2)* |
| 265 | YOR189W | endocytosis: decreased | (0.50) |
| 266 | YOR211C | endocytosis: decreased | (0.49) |
| 267 | YOR255W | endocytosis: decreased | (0.93) |
| 268 | YOR322C | endocytosis: decreased | (0.47) |
| 269 | YPL002C | endocytosis: decreased | 0.10   |
| 270 | YPL042C | endocytosis: decreased | (0.25) |
| 271 | YPL049C | endocytosis: decreased | 0.11   |
| 272 | YPL057C | endocytosis: decreased | 0.29   |
| 273 | YPL066W | endocytosis: decreased | (0.55) |
| 274 | YPL079W | endocytosis: decreased | 0.31   |

|     |         |                        |        |
|-----|---------|------------------------|--------|
| 275 | YPL100W | endocytosis: decreased | 0.29   |
| 276 | YPL101W | endocytosis: decreased | (0.42) |
| 277 | YPL118W | endocytosis: decreased | 0.22   |
| 278 | YPL125W | endocytosis: decreased | 0.84   |
| 279 | YPL129W | endocytosis: decreased | 0.33   |
| 280 | YPL145C | endocytosis: decreased | (0.29) |
| 281 | YPL158C | endocytosis: decreased | 0.29   |
| 282 | YPL178W | endocytosis: decreased | 0.16   |
| 283 | YPL179W | endocytosis: decreased | 0.27   |
| 284 | YPL193W | endocytosis: decreased | 0.29   |
| 285 | YPL212C | endocytosis: decreased | 0.94   |
| 286 | YPL226W | endocytosis: decreased | (0.31) |
| 287 | YPL227C | endocytosis: decreased | 0.17   |
| 288 | YPL239W | endocytosis: decreased | 0.17   |
| 289 | YPL256C | endocytosis: decreased | 0.11   |
| 290 | YPR164W | endocytosis: decreased | (0.50) |
| 291 | YPR173C | endocytosis: decreased | 0.24   |

Listed in alphabetical order, *S. cerevisiae* strains (BY4741 MAT a his3 $\Delta$ 1 leu2 $\Delta$ 0 met15 $\Delta$ 0 ura3 $\Delta$ 0) carrying a null mutant gene with an annotated phenotype in SGD affecting endocytosis were evaluated in their ability to protect against the killing induced by IP-1. The relative area under the growth curve (Relative AUC column) indicates the protecting effect for each null mutants strain tested. The ratio was derived by calculating the area under the curve of the null mutant strain in the presence of IP-1 divided by the area under the growth curve of the null mutant in the absence of IP-1. Every gene with a relative AUC equal or bigger than 1, was considered to fully protect against the killing by IP-1 and are marked with a \*. The results include the AUC for each of the 291 listed mutant strains; every gene that either had a AUC  $\geq$ 1, was annotated to be critical for endocytosis, or had been randomly selected to perform two additional evaluations and their corresponding average AUC values are shown in parenthesis. The genes annotated to function directly on endocytosis (according to GO term clustering) are shadowed.
